# Supplementary material
Source: HighWire-hosted journal article supplement (https://heartasia.bmj.com/content/11/1/e011142)
Supplement: inline-supplementary-material-3 [file inline-supplementary-material-3.docx]

| **Study ID** | **Study Design** | **Adequate Randomization** | **Allocation concealment** | **Blinding** | **Baseline characteristics Balanced** | **Lost to follow up (<20%)** | **Incomplete data (attrition bias)** |
| --- | --- | --- | --- | --- | --- | --- | --- |
| **Kubica et al** | RCT* | Yes | Yes | Yes | Yes | Yes | No |

**Supplemental Table S1:** Bias Risk Assessment for Randomized Controlled Studies.

*RCT: Randomized Controlled Trial
